# Y-profile evidence: close paternal relatives and mixtures

Mikkel M Andersen<sup>1</sup>, David J Balding<sup>2\*</sup>

**1** Department of Mathematical Sciences, Aalborg University, Aalborg, Denmark

**2** Melbourne Integrative Genomics, School of BioSciences and School of Mathematics & Statistics, University of Melbourne, Australia

\* dbalding@unimelb.edu.au

## Abstract

1  
2 We recently introduced a new approach to the evaluation of weight of evidence (WoE)  
3 for Y-chromosome profiles. Rather than attempting to calculate match probabilities, which  
4 is particularly problematic for modern Y-profiles with high mutation rates, we proposed using  
5 simulation to describe the distribution of the number of males in the population with a matching  
6 Y-profile, both the unconditional distribution and conditional on a database frequency of the  
7 profile. Here we further validate the new approach by showing that our results are robust to  
8 assumptions about the allelic ladder and the founder haplotypes, and we extend the approach  
9 in two important directions. Firstly, forensic databases are not the only source of background  
10 data relevant to the evaluation of Y-profile evidence: in many cases the Y-profiles of one or more  
11 relatives of the accused are also available. To date it has been unclear how to use this additional  
12 information, but in our simulation-based approach its effect is readily incorporated. We describe  
13 this approach and illustrate how the WoE that a man was the source of an observed Y-profile  
14 changes when the Y-profiles of some of his male-line relatives are also available. Secondly, we  
15 extend our new approach to mixtures of Y-profiles from two or more males. Surprisingly, our  
16 simulation-based approach reveals that observing a 2-male mixture that includes an alleged  
17 contributor's profile is almost as strong evidence as observing a matching single-contributor  
18 evidence sample, and even 3-male and 4-male mixtures are only slightly weaker.

## 19 Introduction

20 In [1], we presented a radically simple new approach to the evaluation of weight of evidence (WoE)  
21 for Y-chromosome profiles. We showed using simulation that sets of males with the same Y-profile

22 typically number up to a few tens, and rarely more than a few hundreds, almost all of them related  
23 within a few tens of meioses. Our simulation model is implemented in open-source and easy-to-use  
24 R software `malan` [2], allowing these distributions to be approximated under different assumptions  
25 about the variance in reproductive success (VRS) and the population size and growth rate. We  
26 also showed how the distribution of  $|\Omega|$ , the number of males with the same Y-profile as an alleged  
27 source Q, is affected by conditioning on a database count of the profile. In particular, we noted  
28 that a zero count in a database of up to a few thousand profiles conveys little information, since  
29 from the mutation rate we expect any profile to be rare, which is reflected in the unconditional  
30 distribution of  $|\Omega|$ .

31 In some cases the Y-profiles of one or more male-line relatives of Q may also be available.  
32 This information also affects the distribution of  $|\Omega|$ , and here we use a simple modification of our  
33 simulation model to investigate its effect on the WoE. Any patrilineal relative observed to have a  
34 Y-profile not matching that of Q decreases  $|\Omega|$  in distribution, and hence tends to increase the WoE  
35 for Q to be the source of the evidence profile. Conversely a matching relative tends to increase  $|\Omega|$   
36 and so weaken the WoE. Note that if the relative's Y-profile differs from that of Q at multiple loci  
37 then the proposed biological relationship may be called into question; we do not consider further  
38 here the possibility of a mis-specified relationship.

39 Suppose that, rather than observing a profile matching that of Q, we observe a mixture of  
40 the Y-profiles of two or more males such that the profile of Q is “included in the mixture” (every  
41 allele in the profile of Q is observed in the mixed profile). Then, because there can be millions of  
42 distinct profiles that are included in the mixture, it is typically assumed that the WoE for Q to  
43 be a contributor is correspondingly weaker than in a single-contributor case. We show that this  
44 intuition is incorrect. This is because the number of distinct Y-profiles that actually arise in a  
45 real human population is only a minuscule fraction of the possible profiles given the alleles at each  
46 locus. Therefore, although there are many alternative profile combinations that could explain the  
47 observed mixture, the great majority of these combinations do not exist in the population, whereas  
48 the profile of Q has been observed and is likely to also exist in his close relatives. We show that a  
49 2-male mixture that includes Q has almost exactly the same evidential value as a single-contributor  
50 match, and 3-male and 4-male mixtures are only slightly weaker.

51 Before tackling the above two major goals of this paper, we provide further support for our

52 simulation-based approach by showing that our results are robust to assumptions about the allelic  
 53 ladder of the mutation model, and the method of allocation of haplotypes to founders. In [1] we  
 54 assumed an unbounded allelic ladder and that all founders were assigned the same haplotype. Here  
 55 we adopt more realistic assumptions, but first confirm that this change makes little difference to  
 56 the results.

## 57 Methods and materials

### 58 Profiling kits, allelic ladders and founder haplotypes

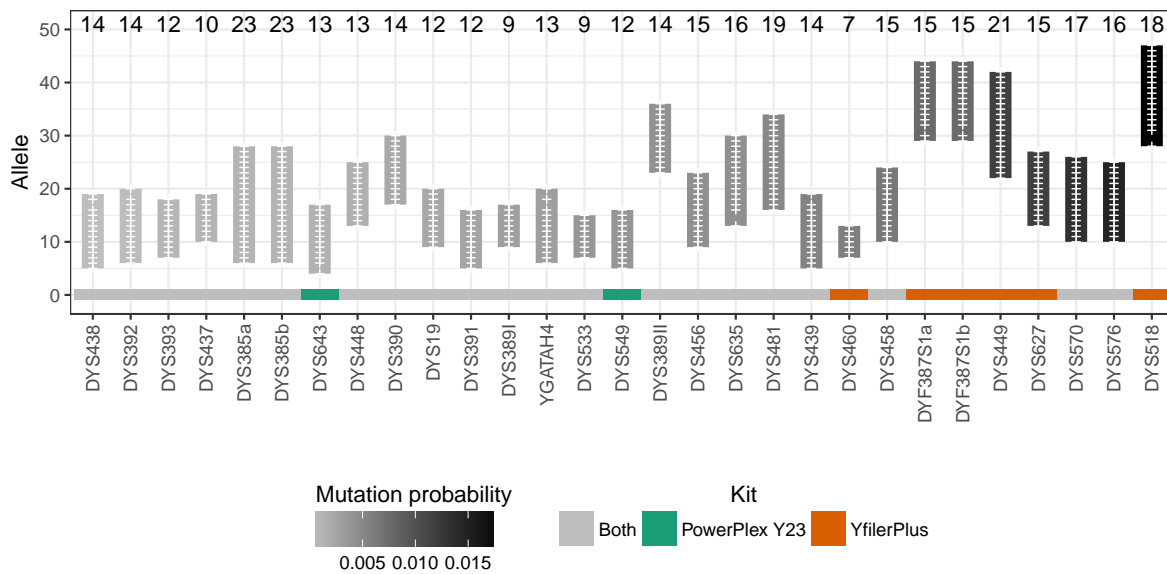

Figure 1: **Profiling kits and allelic ladders.** Only integer alleles are included, not alleles with partial repeats. Vertical bars indicate the ladders, with a “+” for each observed allele, shaded according to the estimated locus mutation rate per generation as indicated in the legend. The size of each allelic ladder is given above the bar. Data are from YHRD.org release 55 [3].

59 We consider two Y-chromosome short tandem repeat (STR) profiling kits: PowerPlex Y23  
 60 (23 loci) and Yfiler Plus (27 loci). As in [1], we continue to consider only integer alleles in our  
 61 simulations, but they are now bounded by  $L$  (lower) and  $U$  (upper). An  $L$  allele can only mutate  
 62 to  $L+1$ , while a  $U$  allele can only mutate to  $U-1$ . All other alleles remain equally likely to increase

63 or decrease at a mutation, and the mutation rate is the same for all alleles at a locus. The values  
64 of  $L$  and  $U$  are specified at each locus corresponding to the integer alleles in YHRD.org release 55  
65 [3] (see Fig. 1). For comparison, we also considered a tiny ladder of size 3 (alleles  $-1$ ,  $0$  and  $1$ ).

66 In [1], all founders in the population simulation got the same haplotype. This implied that if  
67 few mutations occurred since their founders, two live individuals could have matching haplotypes  
68 despite descending from distinct founders. We set the number of generations such that this was  
69 very unlikely, but for further realism we consider here two different ways of assigning haplotypes  
70 to founders:

- 71 • Uniformly random choices from the (integer) allelic ladder, independently at each locus.
- 72 • Haplotypes sampled at random with replacement from a contemporary Danish database of  
73 185 males [4]. We removed profiles with three alleles at DYF387S1, non-integer alleles, or  
74 null alleles, leaving 181 PowerPlex Y23 profiles and 171 Yfiler Plus profiles.

## 75 Population simulations

76 We used our R package `malan` [1, 2, 5] to simulate 10 population genealogies: an initial population  
77 of 5,000 Y chromosomes reproduces for 100 generations, followed by growth at a rate of 2% per  
78 generation for 150 generations, creating a final population size of 102K. Thus, the number of  
79 live males (total of final three generations) is close to 300K. The VRS was fixed here at 0.2; see  
80 Fig. A1 for the distributions of the number of sons and brothers of each male. To each population  
81 simulation we applied two allelic ladders (bounded/unbounded) for each of three assignments of  
82 founder haplotypes (same/random/database) and each of two kits (PowerPlex Y23/Yfiler Plus).  
83 The mutation process was replicated 10 times. Following [1], we used mutation count data [3] with  
84 a  $\text{Beta}(1.5, 200)$  prior distribution at each locus to obtain a posterior distribution from which the  
85 mutation rate was sampled, independently over loci.

86 In each simulation 5,000 males ( $Q$ ) were drawn at random and for each we recorded  $|\Omega|$ , the  
87 number of live males with the same haplotype (including  $Q$ ). Thus, for each of the 12 ladder /  
88 founder / kit combinations, the distribution of  $|\Omega|$  was estimated based on 10 (genealogies)  $\times$   
89 10 (mutation replicates)  $\times$  5,000 (choices of  $Q$ ) =  $5 \times 10^5$  cases. In each simulation, information  
90 about the profiles of close paternal relatives of  $Q$  was also recorded, so that we could approximate  
91 the distribution of  $|\Omega|$  conditional on the profile status of different relatives.

92 For comparison, we include below results from [1] which used a slightly different population  
93 simulation that we now briefly recap: 250 generations; growth of 2% in all generations; initial  
94 population size of 7,365 rising to  $10^6$  in the final generation (in our new simulations, the growth  
95 rate is the same but for fewer generations, and initial and final population sizes are both smaller).  
96 Ten genealogies were simulated; mutation rates were sampled 100 times per genealogy (c.f. 10 here);  
97 only an unbounded allelic ladder was considered with the same haplotype for each founder, and  
98 1,000 Q were sampled per simulation.

## 99 Mixed profiles

100 In general, the preferred measure of the WoE for Q to be a contributor to an evidence sample  
101 is the likelihood ratio (LR) [6]. When the evidence sample shows exactly his profile  $q$ , the LR  
102 is the inverse of a (conditional) match probability, but if we know the Y-haplotype counts in the  
103 population of  $N$  alternative sources of the evidence profile, then the conditioning is irrelevant and  
104 the LR simplifies to

$$\text{LR}_1 = \frac{N}{n_q}, \quad (1)$$

105 where we introduce the notation  $n_a$  for the count of haplotype  $a$  in the population. In [1], we did  
106 not recommend reporting  $\text{LR}_1$ , because the population size relevant to a crime scenario is often  
107 highly uncertain. Instead we recommended reporting an estimate of the haplotype count.

108 Suppose now that the evidence profile  $m$  has two different alleles at  $h$  loci, and no more than  
109 two alleles at any locus. There are  $2^{h-1}$  possible profile pairs that could have produced the mixture,  
110 which is the number of ways of choosing one allele from  $m$  at each locus, and ignoring the order of  
111 the resulting profile pair. Suppose also that an alleged contributor Q has profile  $q$  that is included  
112 in  $m$ . Then a relevant LR to consider compares the hypothesis  $H_p$ , that  $m$  arises from Q and an  
113 unknown male U, relative to the alternative  $H_d$  that  $m$  arises from two unknown males [6]. Under  
114  $H_p$  the profile  $u$  of  $U$  can be inferred from  $q$  and  $m$ , without error if we assume no missing data  
115 or null alleles, and no duplications or heteroplasmy, so both males have exactly one allele at each  
116 locus. Still assuming that the  $n_a$  are known in the population of possible sources of  $m$ , we have:

$$\text{LR}_2 = \frac{P(m | H_p)}{P(m | H_d)} = \frac{n_u/N}{\sum_{r,s} (n_r/N)(n_s/N)} = \frac{Nn_u}{\sum_{r,s} n_r n_s} \quad (2)$$

117 where the summation is over the  $2^{h-1}$  unordered pairs of profiles  $(r, s)$  that combine to give  $m$ .  $\text{LR}_2$   
118 can be interpreted as the probability that two profiles drawn at random in the population form  $m$ ,

119 divided by the probability that a single profile drawn at random forms  $m$  when combined with  $q$ .  
120 If  $n_q$ ,  $n_r$  and  $n_s$  are all of comparable magnitude then  $LR_2 \approx LR_1/2^{h-1}$ . For current Y-profiles,  
121  $2^{h-1}$  can exceed one million, and so the WoE from a mixed evidence profile is usually considered  
122 to be much weaker than from a single-contributor evidence profile.

123 [3, 7] compute (2) directly, using observed database fractions in place of population fractions of  
124 the form  $n_a/N$ . However, databases are not large enough for accurate estimation of these, small,  
125 fractions. More importantly, the relatedness of males with the same haplotype means that they  
126 may be clustered geographically and socially, meaning that the available databases are unlikely to  
127 accurately represent the population of possible sources of the evidence profile in a specific case.

128 [8] used [9, 10] to obtain improved estimates of population fractions by modelling the haplotype  
129 distribution as composed of clades of haplotypes each of which has arisen from one ancestral hap-  
130 lotype by a small number of single-step mutations. Within each clade, independence is assumed  
131 across loci and haplotype probabilities are computed using a mixture of discrete Laplace distribu-  
132 tions. The population fraction of the haplotype is obtained as a weighted sum over the clades (the  
133 weights correspond to the prior probability that a haplotype in the population originates from that  
134 clade).

135 [11] further develop the clade idea, but recognise the importance of the fact that profile  $q$  has  
136 been observed, which is typically not the case for other profiles included in the mixture. They  
137 introduce a “haplotype centred” method to compute the LR, which uses the insight that, given the  
138 observed profile of  $Q$ , the most likely source of a matching or similar profile is in a close patrilineal  
139 relative of  $Q$ , as previously noted by [12].

140 The approach proposed here is different but based on a similar insight. We note that although  
141  $(q, u)$  is just one among many profile pairs that could contribute to the summation in (2), if  $q$  is  
142 the only reference profile available to the investigation that is included in  $m$ , then  $(q, u)$  is expected  
143 to provide the largest contribution to the sum. The number of different Y-profiles that actually  
144 arise in any human population is a tiny fraction of the profiles that are possible. For example, just  
145 the integer alleles of the 27 Yfiler Plus loci shown in Fig. 1 can generate more than  $10^{31}$  distinct  
146 profiles, whereas the worldwide human population is  $< 10^{10}$ . Thus, a random possible profile is  
147 extremely unlikely to actually exist. In contrast, the fact that profile  $q$  has been observed in  $Q$   
148 implies that we expect it to exist in multiple male-line relatives of  $Q$ . Although we have no *a priori*

149 evidence for the existence of profile  $u$ , it is much more likely that one unobserved profile exists in  
150 the population than that two unobserved profiles  $r$  and  $s$  both exist.

To quantify the extent to which the profile pair  $(q, u)$  dominates the summation in (2), we use the 500K `ma1an` simulations described above in the case of bounded allelic ladder and database founder haplotypes. From each simulation, we sample pairs of live males Q and U and form the mixed profile  $m$ . We then search the live population for other pairs of males whose mixed profile is also  $m$ . As for the single-contributor case, because of the problem of specifying  $N$  in practice, instead of  $LR_2$  we recommend reporting

$$N/LR_2 = \frac{\sum_{r,s} n_r n_s}{n_u}.$$

Similarly we search for triples of males with mixed profile  $m$  matching that from Q and two other randomly-selected males, and report

$$N/LR_3 = \frac{\sum_{r,s,t} n_r n_s n_t}{\sum_{u,v} n_u n_v},$$

151 where each  $(r, s, t)$  in the sum is a triple of profiles that combine to form  $m$ , and  $(u, v)$  is a pair of  
152 profiles that when combined with  $q$  form  $m$ . The expression for  $N/LR_4$  is analogous.

## 153 Results

### 154 Robustness to allelic ladder and founder haplotypes:

155 Quantiles of the distribution of  $|\Omega|$ , the number of males with the same Y-profile as Q, are shown  
156 in Table 1 for the different allelic ladders and methods of assigning founder haplotypes. See Fig. A2  
157 for plots. The distributions are similar for all conditions considered here. The biggest, but still  
158 small, impact arises from using a tiny ladder of size three at each locus.

### 159 Profiled male-line relatives:

160 If either the father or the paternal grandfather is observed not to match Q, then the distribution of  
161  $|\Omega|$  gives greatly increased support to low values, whereas a match shifts the distribution slightly  
162 towards higher values compared with the unconditional case (Fig. 2 and Table 2).

| Allelic<br>ladder | Founder<br>haplotypes | 95% quantile |    | 99% quantile |    |
|-------------------|-----------------------|--------------|----|--------------|----|
|                   |                       | PP23         | YP | PP23         | YP |
| Unbounded         | Random                | 73           | 41 | 114          | 64 |
| Unbounded         | Same                  | 73           | 41 | 114          | 64 |
|                   | Previously published  | 73           | 41 | 115          | 63 |
| Bounded           | Random                | 73           | 41 | 115          | 64 |
| Bounded           | Database              | 73           | 41 | 115          | 64 |
| Bounded           | Same                  | 74           | 41 | 115          | 63 |
| $\{-1, 0, 1\}$    | Random                | 77           | 42 | 120          | 65 |

Table 1: **Estimated quantiles of the distribution of  $|\Omega|$ , the number of males with the same Y-profile as  $Q$ .** See text for explanation of the allelic ladders (column 1) and the methods of assigning founder haplotypes (column 2). Row 3 gives results previously published in [1], similar to the case of Row 2 but with a slightly different demographic model as discussed in the text. PP23 = PowerPlex Y23; YP = Yfiler Plus.

163 Fig. 3 and Table 2 describe the distribution of  $|\Omega|$  given information about the match status of  
 164 a specified patrilineal relative, or that there is no relative of the specified type. The effect of the  
 165 latter information is seen to be intermediate between match and mismatch for that relative.

166 While broadly in line with intuition, these results hold some surprises. In general, the closer  
 167 the relative the greater is the effect of a mismatch in decreasing the distribution of  $|\Omega|$ , but the  
 168 direction in time of the relationship is also important: a mismatching father is more important  
 169 than a mismatching son, because the father has more descendants. Similarly, a grandfather is more  
 170 informative than a brother. Moreover, a mismatching brother has only slightly greater impact  
 171 on the quantiles of  $|\Omega|$  than a mismatching cousin: a brother relationship is closer but a cousin  
 172 relationship traverses one extra generation backward in time and is informative about the grandfa-  
 173 ther. For matches, more distant relatives are more informative, with a matching cousin being most  
 174 informative among the relationships considered here, but because a cousin is expected to match  
 175 the impact of this information on the distribution of  $|\Omega|$  is modest.



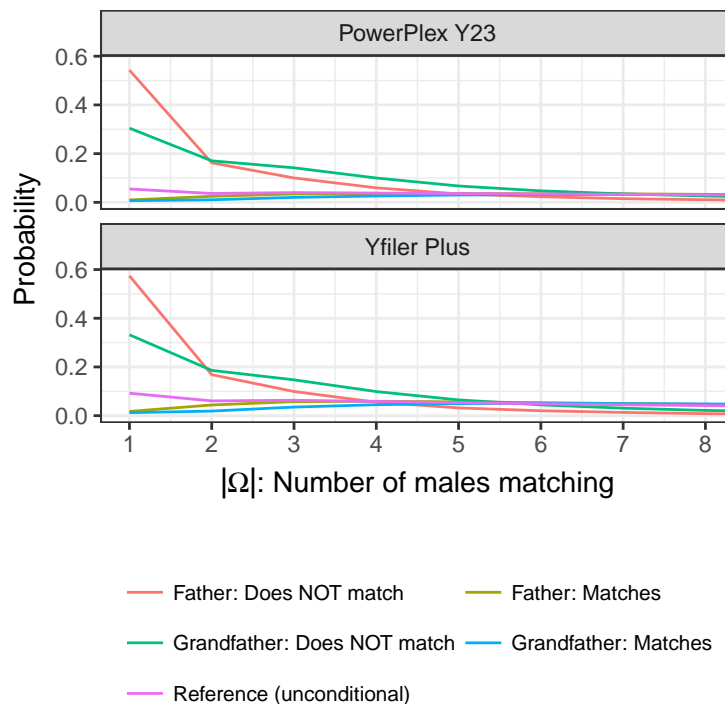

Figure 2: **Distribution of  $|\Omega|$  given father/grandfather profile match information.** “Unconditional” means without information about the Y-profile of any relative of Q. The other lines correspond to match/mismatch information as indicated in the legend.

176 In Fig. 4 the match/mismatch information comes from all the brothers of Q, for Q with between  
 177 one and three brothers. For Q with two or three brothers, all of them with a Y-profile different  
 178 from Q, the distribution of  $|\Omega|$  is similar to the case that Q is found not to match his father.

### 179 **Mixed profiles:**

180 For 97% of 2-male Yfiler Plus (YP) mixed profiles, the mixture cannot be formed from any other  
 181 pair of profiles that actually exists in the population (Table 3, second row). In that case, a mixed  
 182 evidence profile is equivalent to an evidence profile exactly matching  $q$ . This equivalence holds for  
 183 93% of 2-male PowerPlex Y23 (PP23) mixtures; for 56% (YP) and 42% (PP23) of 3-male mixtures  
 184 and for 20% (YP) and 10% (PP23) of 4-male mixtures, respectively.

185 To explain this startling result in simpler terms, imagine a mixture in which alleles 1 and 2

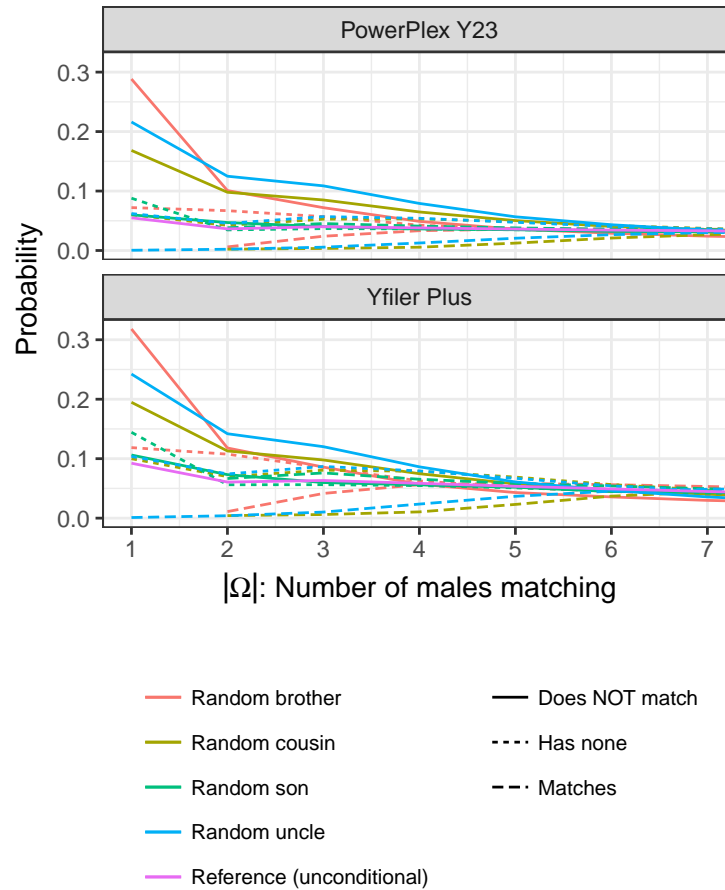

Figure 3: **Distribution of  $|\Omega|$  given that Q has no son, brother, patrilineal cousin or paternal uncle, or match information from a random one of them.** Each curve is coded by its colour and line type (see legend); no information is available about male-line relatives other than the one specified. The reference line corresponds to no information from relatives of Q.

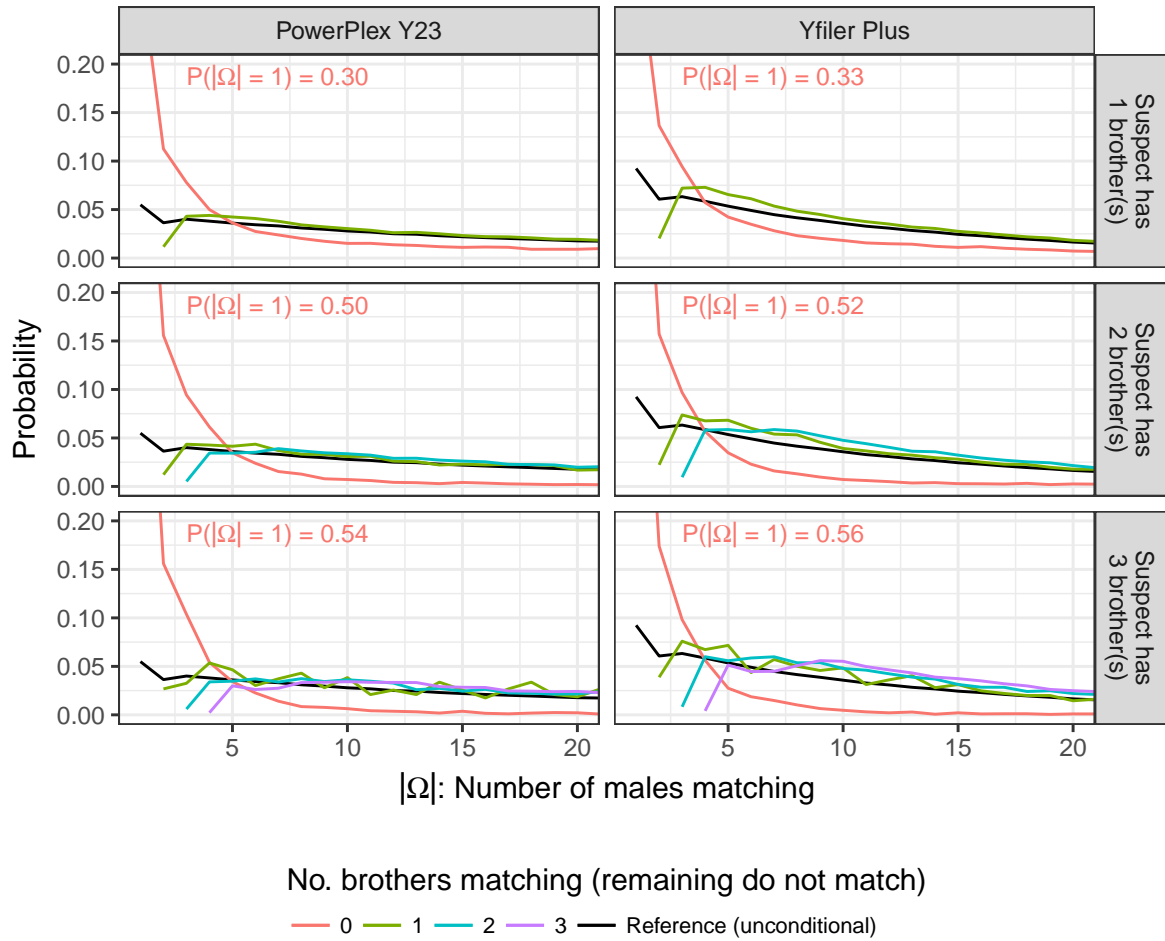

Figure 4: **Distribution of  $|\Omega|$  given match information for all brothers when Q has up to three brothers.** The value of  $P(|\Omega|=1)$  when all brothers mismatch is off the plot and is given numerically.

| Data                           | 95% quantile |    | 99% quantile |    |
|--------------------------------|--------------|----|--------------|----|
|                                | PP23         | YP | PP23         | YP |
| Father: Does NOT match         | 9            | 7  | 30           | 15 |
| Grandfather: Does NOT match    | 13           | 10 | 32           | 18 |
| Random uncle: Does NOT match   | 48           | 27 | 90           | 49 |
| Random brother: Does NOT match | 56           | 32 | 97           | 54 |
| Random cousin: Does NOT match  | 58           | 33 | 98           | 55 |
| Random son: Does NOT match     | 72           | 40 | 113          | 61 |
| Reference (unconditional)      | 73           | 41 | 115          | 63 |
| Random son: Matches            | 74           | 42 | 115          | 65 |
| Father: Matches                | 76           | 43 | 117          | 65 |
| Random brother: Matches        | 77           | 44 | 119          | 67 |
| Grandfather: Matches           | 78           | 45 | 120          | 68 |
| Random uncle: Matches          | 80           | 47 | 122          | 70 |
| Random cousin: Matches         | 81           | 48 | 123          | 71 |

Table 2: **Estimated quantiles of the distribution of  $|\Omega|$  given match information about specified patrilineal relatives.** See Figs 2, 3 for plots.  
 PP23 = PowerPlex Y23; YP = Yfiler Plus.

186 are observed at each of 25 loci and an alleged contributor Q has allele 1 at every locus. Then the  
 187 number of possible distinct profile pairs contributing to the mixture is  $2^{24}$  or almost 17 million.  
 188 However, under our simulation model, it is highly probable that the two profiles contributing to the  
 189 mixture are  $(1, 1, \dots, 1)$  and  $(2, 2, \dots, 2)$ : the other 17 million possible profile pairs are collectively  
 190 unlikely to exist in the population.

191 Table 3 does not answer the WoE problem for mixed evidence profiles, but it helps explain Fig. 5  
 192 which shows the distribution in our simulations of  $N/LR_k$  for  $k = 1, \dots, 4$  (ignoring those counted  
 193 in the first row of Table 3). As expected, the distribution is shifted towards higher values as  $k$   
 194 increases, reflecting reduced WoE as the number of contributors to the evidence sample increases.  
 195 What is striking and counter-intuitive is that the reduction in WoE is so slight. One guide to the

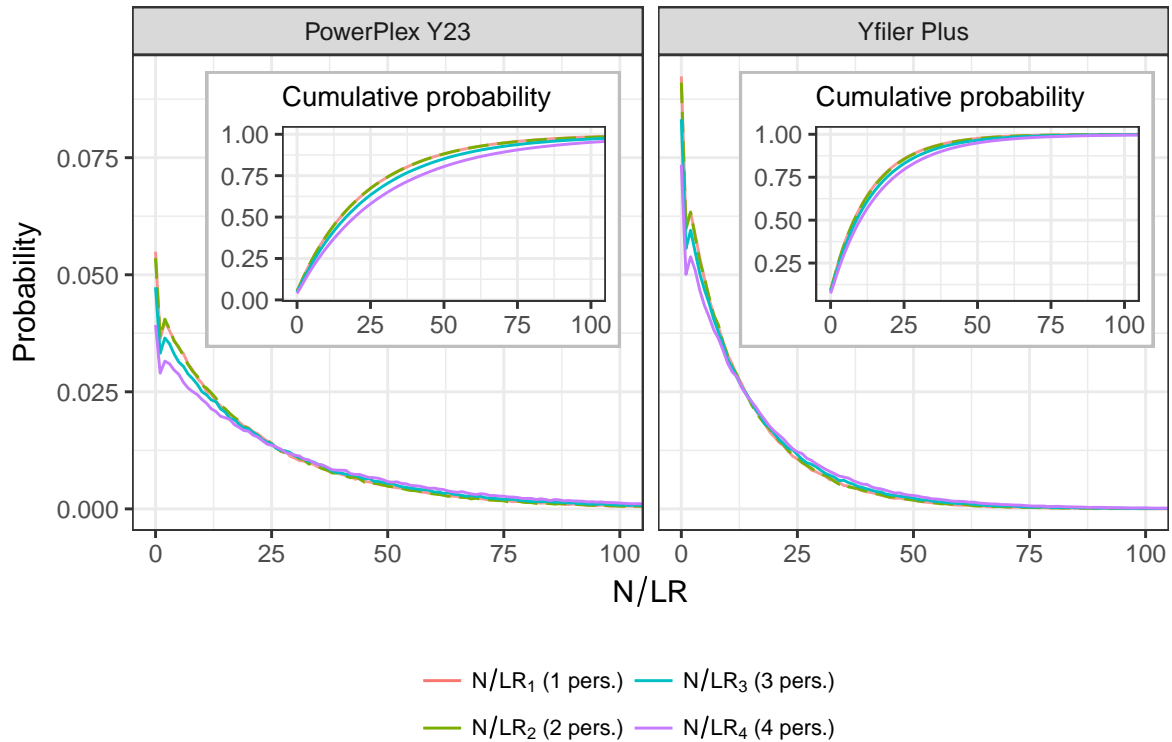

Figure 5: **The distribution of  $N/LR_k$  for  $k = 1, \dots, 4$ .** The case  $k = 1$  corresponds to Fig. 4 of [1], and describes the distribution of the number of males with Y-profile matching that of a single-contributor evidence profile. The other curves describe the distribution of an analogous measure of WoE (see methods) when a reference profile  $q$  is included in a  $k$ -male mixture,  $k = 2, 3, 4$ . The red and green curves ( $k = 1, 2$ ) are almost indistinguishable and are shown with alternating colours. See Table 4 for key quantiles.

| Number of<br><i>k</i> -sets | <i>k</i> = 2    |                 | <i>k</i> = 3    |                 | <i>k</i> = 4    |                 |
|-----------------------------|-----------------|-----------------|-----------------|-----------------|-----------------|-----------------|
|                             | PP23            | YP              | PP23            | YP              | PP23            | YP              |
| 0                           | 48 (0.01)       | 15 (0.00)       | 257 (0.05)      | 101 (0.02)      | 8,082 (1.62)    | 1,299 (0.26)    |
| 1                           | 466,904 (93.38) | 482,896 (96.58) | 208,726 (41.75) | 281,520 (56.30) | 49,639 (9.93)   | 100,730 (20.15) |
| 2                           | 30,655 (6.13)   | 16,411 (3.28)   | 134,358 (26.87) | 130,569 (26.11) | 71,470 (14.29)  | 114,609 (22.92) |
| 3-49                        | 2,393 (0.48)    | 678 (0.14)      | 156,455 (31.29) | 87,795 (17.56)  | 340,711 (68.14) | 277,847 (55.57) |
| ≥ 50                        | 0               | 0               | 204 (0.04)      | 15 (0.00)       | 30,098 (6.02)   | 5,515 (1.10)    |

Table 3: **Distribution of the number of distinct *k*-sets of profiles yielding a given *k*-male mixed Y profile.** Each cell records the count (%) of 500K simulated *k*-male mixtures that could be obtained in the number of different ways indicated in the first column. The first row (0) corresponds to when the mixture is not recognised as a *k*-male mixture because no locus had *k* alleles. For *k* = 2 this only happens when the two contributors have the same profile. The second row (1) corresponds to cases when the profiles generating the mixture form the only *k*-set of profiles in the live population that combine to form that mixture. PP23 = PowerPlex Y23; YP = Yfiler Plus.

196 correct intuition is that, for example when *k* = 4, if there are many quadruples of males in the  
 197 population whose profiles combine to make *m*, then there are also many triples that when combined  
 198 with *q* also make *m*: the Spearman correlation between the number of quadruples and the number  
 199 of triples is around 0.85 for both kits.

## 200 Discussion

201 We have further developed our new and powerful simulation-based approach to assessing the weight  
 202 of Y-profile evidence [1]. We have extended it to allow conditioning on the profiles of some male-  
 203 line relatives of the alleged contributor Q, and to evidence samples that include DNA from up to  
 204 four males. The simulations underlying our results can be performed for any profiling kit, which is  
 205 demonstrated in a vignette in the R package `malan` [2].

206 The results for conditioning on male-line relatives broadly match intuition though with some

|          | 95% quantile |    | 99% quantile |    |
|----------|--------------|----|--------------|----|
|          | PP23         | YP | PP23         | YP |
| $N/LR_1$ | 72           | 40 | 113          | 63 |
| $N/LR_2$ | 72           | 41 | 119          | 64 |
| $N/LR_3$ | 82           | 45 | 139          | 71 |
| $N/LR_4$ | 99           | 51 | 177          | 83 |

Table 4: **Estimated quantiles of the distribution of  $N/LR_k$  for  $k = 1, \dots, 4$ .** See Fig. 5 for plots. PP23 = PowerPlex Y23; YP = Yfiler Plus.

207 surprising aspects. If either the father or grandfather of Q is observed to have a Y-profile different  
 208 from Q, then the number of matching males  $|\Omega|$  is greatly reduced, and consequently the Y-profile  
 209 evidence is strengthened in favour of Q being the source (Fig. 2). More generally, the distribution of  
 210  $|\Omega|$  is reduced for any observed mismatch with a male-line relative of Q. The converse is also true:  
 211 observed relative matches reduce the WoE. However, the magnitude of effect is not symmetric.  
 212 From Table 2, we see that the observation of a mismatching father has the greatest impact on the  
 213 distribution of  $|\Omega|$ , whereas a matching father has little impact.

214 Our most striking result is that the observation that the profile of Q is included in a mixed  
 215 evidence profile with up to four contributors is almost as strong evidence for Q to be a contributor  
 216 as is a match with a single-contributor evidence profile. In particular, being included in a 2-male  
 217 mixture has virtually the same evidence value as a single-contributor match. This property was  
 218 not apparent using previous approaches to evaluating mixtures. Although there are many other  
 219 sets of profiles that could generate the mixture, if a possible profile has not been observed it is very  
 220 unlikely to actually exist in the population. It follows that a 2-male mixed evidence profile can be  
 221 presented to a court in terms of an equivalent single-contributor profile, using the suggestions we  
 222 made in [1]. A similar approach may also be feasible for 3-male and 4-male mixtures.

223 The results reported here have been obtained using one model, but `malan` can be used to  
 224 investigate alternative mutation models and demographic scenarios. As we noted in [1], almost all  
 225 Y-profile matches are between males who are related to within a few tens of meioses. It follows that  
 226 our results are robust to the mutation mechanism, with only the mutation rate being important.

227 Moreover the number of matching males is typically up to a few tens, which is small relative to the  
228 population size and so our results are also reasonably robust to details of the demographic model  
229 [1]. We have confirmed here that the distribution of  $|\Omega|$  is robust to assumptions about the allelic  
230 ladder and the allocation of founder haplotypes.

231 Overall, these results further advance the case for use of our new simulation-based paradigm  
232 for Y-profile evidence, introduced in [1]. We have demonstrated here that our approach is flexible  
233 enough to incorporate new kinds of evidence, and it leads to important new insights about the  
234 strength of Y-profile evidence.

## 235 Acknowledgements

236 This work was supported in part by the Otto Mønsted Foundation and a short term fellowship  
237 from the International Society for Forensic Genetics (ISFG).

## 238 References

- 239 [1] Mikkel M Andersen and David J Balding. How convincing is a matching Y-chromosome profile?  
240 *PLOS Genetics*, 13(11):e1007028, 2017.
- 241 [2] Mikkel M Andersen. malan: MAle Lineage ANalysis. *The Journal of Open Source Software*,  
242 3(25), 2018.
- 243 [3] S Willuweit and L Roewer. The new Y chromosome haplotype reference database. *Forensic*  
244 *Science International: Genetics*, 15:43–48, 2015.
- 245 [4] Charlotte Hallenberg, Karsten Nielsen, Bo Simonsen, Juan Sanchez, and Niels Morling. Y-  
246 chromosome STR haplotypes in Danes. *Forensic Science International*, 155 2-3:205–10, 2005.
- 247 [5] R Development Core Team. *R: A Language and Environment for Statistical Computing*. R  
248 Foundation for Statistical Computing, Vienna, Austria, 2018. ISBN 3-900051-07-0.
- 249 [6] C.D. Steele and D. Balding. *Weight of evidence for forensic DNA profiles*. Wiley, 2nd edition,  
250 2015.



- 251 [7] Andreas Wolf, Amke Caliebe, Olaf Junge, and Michael Krawczak. Forensic interpretation of  
252 Y-chromosomal DNA mixtures. *Forensic Science International*, 152(2):209–213, 2005.
- 253 [8] Mikkel Meyer Andersen, Poul Svante Eriksen, Helle Smidt Mogensen, and Niels Morling.  
254 Identifying the most likely contributors to a Y-STR mixture using the discrete Laplace method.  
255 *Forensic Science International: Genetics*, 15:76–83, 2015.
- 256 [9] M. M. Andersen, P. S. Eriksen, and N. Morling. The discrete Laplace exponential family and  
257 estimation of Y-STR haplotype frequencies. *Journal of Theoretical Biology*, 329:39–51, 2013.
- 258 [10] Mikkel M Andersen. Discrete Laplace mixture model with applications in forensic genetics.  
259 *The Journal of Open Source Software*, 3(26), 2018.
- 260 [11] D Taylor, J Curran, and J Buckleton. Likelihood ratio development for mixed Y-STR profiles.  
261 *Forensic Science International: Genetics*, 35:82–96, 2018.
- 262 [12] C Brenner. Understanding Y haplotype matching probability. *Forensic Science International:*  
263 *Genetics*, 8:233–43, 2014.

264 **Supplementary information**

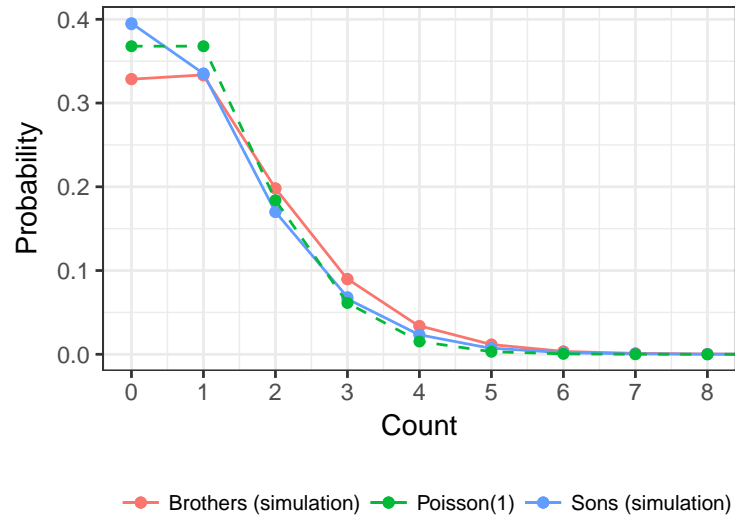

Figure A1: **The distribution of the numbers of sons and brothers of each male.** Note that these distributions are affected both by the variance in reproductive success (here,  $VRS = 0.2$ ) and the population growth rate (0.02). The Poisson(1) distribution is plotted for comparison.

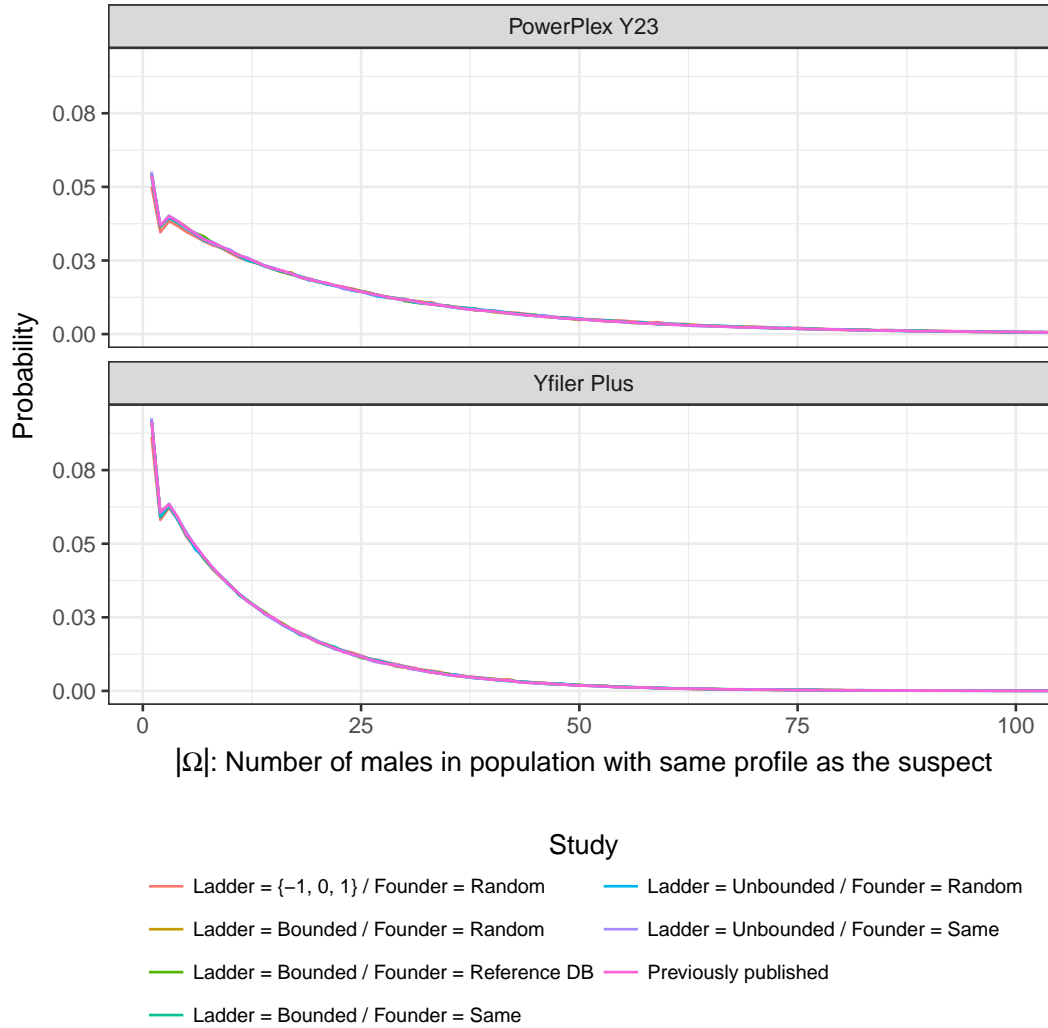

Figure A2: **Distributions of  $|\Omega|$  under six models for allelic ladder and founder haplotype assignment.** The distribution reported in [1] is also shown.
